# Supplementary material
Source: Research Square preprint supplement (doi:10.21203/rs.3.rs-9777557/v1)
Supplement: Supplementary file 1 [file 492f66e6ec1a45846bbc2a69.docx]

# **Supplementary Material**

## ****S1. Probability Distributions****

Let be independent observations of a climatic variable. Selecting appropriate marginal distributions is essential for accurate probabilistic modeling of hydro-climatic variables, which often exhibit skewness and non-normal behavior.

### ****S1.1 Gamma Distribution****

Widely used for precipitation modeling due to its ability to capture positive skewness (Vicente-Serrano et al., 2010).

(S1)

The cumulative distribution function (CDF) is give by:

(S2)

where γ(⋅) is the lower incomplete gamma function.

**Log-likelihood function:**

(S3)

**MLE estimation:**

(S4)

(S5)

Solve for using Newton–Raphson, where ψ(⋅) is the digamma function.

### ****S1.2 Log-normal Distribution****

Appropriate for multiplicative climatic processes (Vicente-Serrano et al., 2010). Let then the pdf is given by:

(S6)

The cumulative distribution function (CDF) is give by:

(S7)

Parameter estimation through the MLE method:

### ****S1.3 Normal Distribution****

Commonly used for temperature variables due to symmetry.

(S10)

Parameter estimation through the MLE method:

### ****S1.4 Weibull Distribution****

This distribution is more flexible for modeling evapotranspiration variability. The PDF is given by:

(S13)

The CDF is as follows:

(S14)

Log-likelihood:

(S15)

(S16)

(S17)

Solve numerically using the Newton–Raphson formula.

## ****S2. Copula Theory****

Copulas provide a flexible framework for modeling dependence structures independently of the marginal distributions (Genest & Favre, 2007). Let , be uniforms on [0,1].

### ****S2.1 Sklar's Theorem****

(S18)

where (S19)

This allows decomposition of joint distributions into marginals and dependence structure.

### ****S2.2 Clayton Copula (Lower-tail dependence)****

### ****Copula:****

(S20)

Density:

(S21)

- **Lower-tail dependence**

(S22)

**S2.3 Gumbel Copula (Upper-tail dependence)**

(S23)

- **Upper-tail dependence**

(S24)

**S2.4 Frank Copula (Symmetric)**

(S25)

(S26)

Copula-based approaches are widely used in drought modeling due to their ability to capture nonlinear and asymmetric dependence (Genest & Favre, 2007; Afshar et al., 2024).

**S3:** **Estimation of Potential Evapotranspiration (ET0) using the FAO‑56 Penman‑Monteith method**

The Evapotranspiration (ET0) based on FAO‑56 Penman‑Monteith method can be calculated using minimum and maximum air temperature as follows (Allen et al., 1998):

**Step 1: Wind Speed at 2 m Height (u2​)**

In the absence of measured wind data, a default value of 2 m s⁻¹ is used, which is considered the average wind speed for many locations recommended by FAO 56. It is denoted and is given by:

(S27)

### Step 2: ****Actual Vapour Pressure (*****ea*​****)****

The actual vapour pressure is estimated by assuming the dew point temperature (​) is roughly equal to the daily minimum temperature (​). This approximation works well in many climates because the air tends to be near saturation when temperatures are lowest.

The saturation vapour pressure function (*e*0(*T*)) is:

(S28)

where *e*0(*T*) is in kPa and T in °C.

Then the actual vapour pressure (ea) is:

ea=e0()= (S29)

### Step 3: ****Solar Radiation (****Rs****)****

Solar radiation is estimated from the temperature range using the **Hargreaves radiation formula as follows:**

Rs​=​​*​*Ra*​ (S30)

where:

- Ra​ = extraterrestrial radiation (MJ m⁻² d⁻¹), calculated from latitude and day of year.
- ​ = daily temperature range (°C).
- is an empirical coefficient which is =0.16 for **interior** regions and = 0.19 for **coastal** regions. To avoid unrealistic values, ​ was capped at the clear‑sky limit, i.e., ​​=min(​​, 0.75​​)

### Step 4: ****Extraterrestrial Radiation (****​****)****

Ra​ is a function of latitude and day of year:

​ = (S31)

where:

- =0.0820 MJ m⁻² min⁻¹ (solar constant).
- ​ = inverse relative distance Earth–Sun:

(S32)

*J* = day of year (1 = 1 January).

- δ = solar declination (rad):
- δ=0.409sin([(2*π*​/365)**J*]−1.39)
- *φ* = latitude in radians (converted from decimal degrees)
- ωs​ = sunset hour angle (rad):
- ωs=arccos[−tan(φ)tan(δ)]

### ****Step 5: Clear‑sky Radiation (****​****)****

For simplicity, clear‑sky solar radiation was approximated as:

​= 0.75*Ra*​ (S33)

### Step 6: ****Net Radiation ()****

Net radiation is the balance between incoming shortwave and outgoing longwave radiation.

#### **Net shortwave radiation (**​**)**

For a grass reference crop, *α*=0.23:

= (1−*α*)​= 0.77​​ (S34)

#### **Net longwave radiation (**​**)**

= (S35)

where:

- σ=4.903×10−9 MJ K⁻⁴ m⁻² d⁻¹ (Stefan–Boltzmann constant)
- ​+273.16
- ​+273.16
- ​ is the actual vapour pressure from Step 2.

#### **Net radiation**

(S36)

### Step 7: ****Soil Heat Flux (****G****)****

For daily periods, the soil heat flux is negligible:

*G*≈0

### Step 8: ****Psychrometric Constant (*****γ*****)****

The psychrometric constant depends on atmospheric pressure, which is a function of elevation *z*(m). First, atmospheric pressure *P* (kPa) is estimated:

P= (S37)

**Psychrometric constant:**

*γ*=0.000665*P*

### Step 9: ****Slope of Saturation Vapour Pressure Curve (****Δ****)****

Δ= (S38)

where (​+​)/2 (°C) and is the saturation vapour pressure at the mean temperature.

**Step 10: FAO‑56 Penman‑Monteith Equation**

Finally, the reference evapotranspiration *ET*0​ (mm d⁻¹) is computed as:

ET0= (S39)

where:

- =*e*0() = saturation vapour pressure at mean air temperature (kPa).
- All other terms have been defined above, and each depends either directly on your data (​, *φ*, *z*) or on standard FAO‑56 defaults.

**S4: Nash–Sutcliffe Efficiency (NSE)**

The model's performance was assessed using the Nash–Sutcliffe Efficiency (NSE) coefficient, a common metric in hydrological and climate studies for evaluating how well predicted values match observations. NSE quantifies the model's predictive accuracy by comparing the residual variance to the observed data variance. Higher NSE scores reflect improved model performance.

The NSE statistic is defined as:

(S40)

where Yi represents the observed values, ​ denotes the predicted values, is the mean of the observed values, and n is the total number of observations.

The NSE ranges from −∞ to 1, with 1 indicating perfect agreement between observed and predicted data. Values closer to zero or negative indicate poorer predictive performance. According to Moriasi et al. (2007), NSE scores above 0.75 denote very good performance; between 0.65 and 0.75, good performance; 0.50 to 0.65, satisfactory performance; and below 0.50, unsatisfactory performance. In this study, NSE was used to assess the predictive accuracy of the proposed CEMLDI framework for the target variable (Y).

**S5: Permutation Variable Importance for Sensitivity Analysis**

For feature j:

1. Compute baseline error E.
2. Permute ​ to get ​, compute .

(S41)

**Table S1: selection of the best-fit CEMLDI model for each station at 3, 6, 9, and 12-month time scales using RMSE, MAE, R2, and NSE selection criteria.**

| **Station** | **Time Scale** | **CEMLDI Model** | **RMSE** | **MAE** | **NSE** |
| --- | --- | --- | --- | --- | --- |
| Chhor | 3 | Model A | 0.84 | 0.68 | 0.327 |
| 3 | Model B | 0.851 | 0.694 | 0.308 |
| 3 | Model C (Best) | 0.846 | 0.67 | 0.317 |
| 6 | Model A | 0.838 | 0.685 | 0.243 |
| 6 | Model B | 0.822 | 0.675 | 0.271 |
| 6 | Model C (Best) | 0.812 | 0.662 | 0.29 |
| 9 | Model A | 0.915 | 0.73 | 0.179 |
| 9 | Model B | 0.902 | 0.717 | 0.202 |
| 9 | Model C (Best) | 0.891 | 0.706 | 0.221 |
| 12 | Model A | 0.987 | 0.795 | 0.043 |
| 12 | Model B | 0.998 | 0.803 | 0.022 |
| 12 | Model C (Best) | 1.016 | 0.814 | -0.014 |
| D.I Khan | 3 | Model A | 0.735 | 0.589 | 0.388 |
| 3 | Model B | 0.742 | 0.6 | 0.377 |
| 3 | Model C (Best) | 0.74 | 0.597 | 0.38 |
| 6 | Model A | 0.871 | 0.685 | 0.115 |
| 6 | Model B | 0.873 | 0.681 | 0.111 |
| 6 | Model C (Best) | 0.882 | 0.686 | 0.093 |
| 9 | Model A | 1.038 | 0.824 | 0.046 |
| 9 | Model B | 1.031 | 0.825 | 0.059 |
| 9 | Model C (Best) | 1.031 | 0.825 | 0.059 |
| 12 | Model A | 0.99 | 0.774 | 0.029 |
| 12 | Model B | 0.976 | 0.776 | 0.056 |
| 12 | Model C (Best) | 0.978 | 0.78 | 0.052 |
| Jaccobabad | 3 | Model A | 0.736 | 0.598 | 0.396 |
| 3 | Model B | 0.722 | 0.585 | 0.42 |
| 3 | Model C (Best) | 0.718 | 0.579 | 0.425 |
| 6 | Model A | 0.87 | 0.71 | 0.214 |
| 6 | Model B | 0.882 | 0.72 | 0.193 |
| 6 | Model C (Best) | 0.895 | 0.733 | 0.168 |
| 9 | Model A | 0.967 | 0.779 | 0.022 |
| 9 | Model B | 0.97 | 0.772 | 0.016 |
| 9 | Model C (Best) | 1.002 | 0.791 | -0.05 |
| 12 | Model A | 0.918 | 0.736 | -0.019 |
| 12 | Model B | 0.899 | 0.715 | 0.022 |
| 12 | Model C (Best) | 0.915 | 0.732 | -0.013 |
| Khanpur | 3 | Model A | 0.707 | 0.539 | 0.465 |
| 3 | Model B | 0.695 | 0.54 | 0.483 |
| 3 | Model C (Best) | 0.671 | 0.523 | 0.517 |
| 6 | Model A | 0.898 | 0.748 | 0.093 |
| 6 | Model B | 0.905 | 0.746 | 0.08 |
| 6 | Model C (Best) | 0.927 | 0.759 | 0.034 |
| 9 | Model A | 0.989 | 0.792 | 0.05 |
| 9 | Model B | 0.99 | 0.797 | 0.048 |
| 9 | Model C (Best) | 1.011 | 0.816 | 0.007 |
| 12 | Model A | 0.998 | 0.834 | -0.019 |
| 12 | Model B | 0.996 | 0.833 | -0.015 |
| 12 | Model C (Best) | 1.019 | 0.849 | -0.062 |
| Multan | 3 | Model A | 0.755 | 0.593 | 0.415 |
| 3 | Model B | 0.76 | 0.596 | 0.407 |
| 3 | Model C (Best) | 0.75 | 0.577 | 0.424 |
| 6 | Model A | 0.869 | 0.701 | 0.09 |
| 6 | Model B | 0.874 | 0.701 | 0.079 |
| 6 | Model C (Best) | 0.886 | 0.708 | 0.053 |
| 9 | Model A | 0.908 | 0.751 | 0.14 |
| 9 | Model B | 0.907 | 0.761 | 0.143 |
| 9 | Model C (Best) | 0.91 | 0.766 | 0.138 |
| 12 | Model A | 0.96 | 0.798 | -0.089 |
| 12 | Model B | 0.964 | 0.802 | -0.097 |
| 12 | Model C (Best) | 0.984 | 0.816 | -0.143 |
| Panjgur | 3 | Model A | 0.766 | 0.641 | 0.38 |
| 3 | Model B | 0.782 | 0.668 | 0.354 |
| 3 | Model C (Best) | 0.784 | 0.662 | 0.35 |
| 6 | Model A | 1.003 | 0.817 | 0.1 |
| 6 | Model B | 1.003 | 0.815 | 0.099 |
| 6 | Model C (Best) | 1.013 | 0.813 | 0.082 |
| 9 | Model A | 0.972 | 0.82 | 0.097 |
| 9 | Model B | 0.976 | 0.813 | 0.09 |
| 9 | Model C (Best) | 0.997 | 0.821 | 0.05 |
| 12 | Model A | 1.004 | 0.815 | -0.021 |
| 12 | Model B | 1.009 | 0.815 | -0.031 |
| 12 | Model C (Best) | 1.048 | 0.849 | -0.113 |
| Peshawar | 3 | Model A | 0.777 | 0.641 | 0.327 |
| 3 | Model B | 0.788 | 0.646 | 0.309 |
| 3 | Model C (Best) | 0.777 | 0.623 | 0.328 |
| 6 | Model A | 0.942 | 0.78 | 0.017 |
| 6 | Model B | 0.935 | 0.775 | 0.033 |
| 6 | Model C (Best) | 0.938 | 0.776 | 0.025 |
| 9 | Model A | 0.975 | 0.765 | -0.038 |
| 9 | Model B | 0.98 | 0.762 | -0.048 |
| 9 | Model C (Best) | 0.986 | 0.748 | -0.06 |
| 12 | Model A | 1.012 | 0.804 | -0.014 |
| 12 | Model B | 1.012 | 0.802 | -0.014 |
| 12 | Model C (Best) | 1.016 | 0.807 | -0.023 |
| Quetta | 3 | Model A | 0.855 | 0.671 | 0.326 |
| 3 | Model B | 0.86 | 0.683 | 0.318 |
| 3 | Model C (Best) | 0.873 | 0.68 | 0.298 |
| 6 | Model A | 1.085 | 0.932 | -0.043 |
| 6 | Model B | 1.066 | 0.917 | -0.008 |
| 6 | Model C (Best) | 1.08 | 0.928 | -0.033 |
| 9 | Model A | 1.039 | 0.848 | -0.015 |
| 9 | Model B | 1.019 | 0.84 | 0.026 |
| 9 | Model C (Best) | 1.036 | 0.862 | -0.007 |
| 12 | Model A | 0.962 | 0.791 | -0.051 |
| 12 | Model B | 0.952 | 0.779 | -0.03 |
| 12 | Model C (Best) | 0.96 | 0.786 | -0.048 |
| Sialkot | 3 | Model A | 0.87 | 0.665 | 0.24 |
| 3 | Model B | 0.867 | 0.681 | 0.246 |
| 3 | Model C (Best) | 0.867 | 0.68 | 0.246 |
| 6 | Model A | 0.939 | 0.729 | 0.054 |
| 6 | Model B | 0.951 | 0.732 | 0.029 |
| 6 | Model C (Best) | 0.952 | 0.729 | 0.028 |
| 9 | Model A | 0.933 | 0.724 | 0.067 |
| 9 | Model B | 0.936 | 0.73 | 0.061 |
| 9 | Model C (Best) | 0.943 | 0.738 | 0.046 |
| 12 | Model A | 1.001 | 0.785 | 0.045 |
| 12 | Model B | 1.016 | 0.796 | 0.018 |
| 12 | Model C (Best) | 1.028 | 0.807 | -0.006 |
| Skardu | 3 | Model A | 0.758 | 0.594 | 0.239 |
| 3 | Model B | 0.749 | 0.591 | 0.256 |
| 3 | Model C (Best) | 0.747 | 0.585 | 0.26 |
| 6 | Model A | 0.875 | 0.707 | 0.154 |
| 6 | Model B | 0.878 | 0.711 | 0.147 |
| 6 | Model C (Best) | 0.884 | 0.711 | 0.136 |
| 9 | Model A | 0.991 | 0.81 | 0.011 |
| 9 | Model B | 0.995 | 0.815 | 0.003 |
| 9 | Model C (Best) | 1.013 | 0.822 | -0.034 |
| 12 | Model A | 1.002 | 0.831 | 0.019 |
| 12 | Model B | 0.996 | 0.825 | 0.031 |
| 12 | ModelC (Best) | 1.012 | 0.832 | -0.001 |

**Table S2. Out-of-Bag (OOB) performance metrics for CEMLDI random forest models across all stations at the 3-month scale. OOB_RMSE (Root Mean Square Error) quantifies the average prediction error, with lower values indicating better accuracy. OOB_Error is the mean squared error from out-of-bag predictions. Var_Explained_Pct indicates the percentage of variance in SPEI explained by the model. Performance varies across stations, with Jaccobabad showing the lowest RMSE (0.7343) and the highest variance explained (42.04%), while Multan and Quetta show relatively higher prediction errors.**

| Station | OOB RMSE | OOB Error | Variance Explained (%) |
| --- | --- | --- | --- |
| Chhor | 0.7748 | 0.6003 | 31.91 |
| D.I Khan | 0.8442 | 0.7126 | 27.06 |
| Jaccobabad | 0.7343 | 0.5392 | 42.04 |
| Khanpur | 0.8015 | 0.6424 | 31.8 |
| Multan | 0.8783 | 0.7714 | 17.76 |
| Panjgur | 0.8624 | 0.7437 | 21.12 |
| Peshawar | 0.8728 | 0.7618 | 24.98 |
| Quetta | 0.8699 | 0.7568 | 15.68 |
| Sialkot | 0.8711 | 0.7587 | 21.14 |
| Skardu | 0.8726 | 0.7614 | 25.16 |


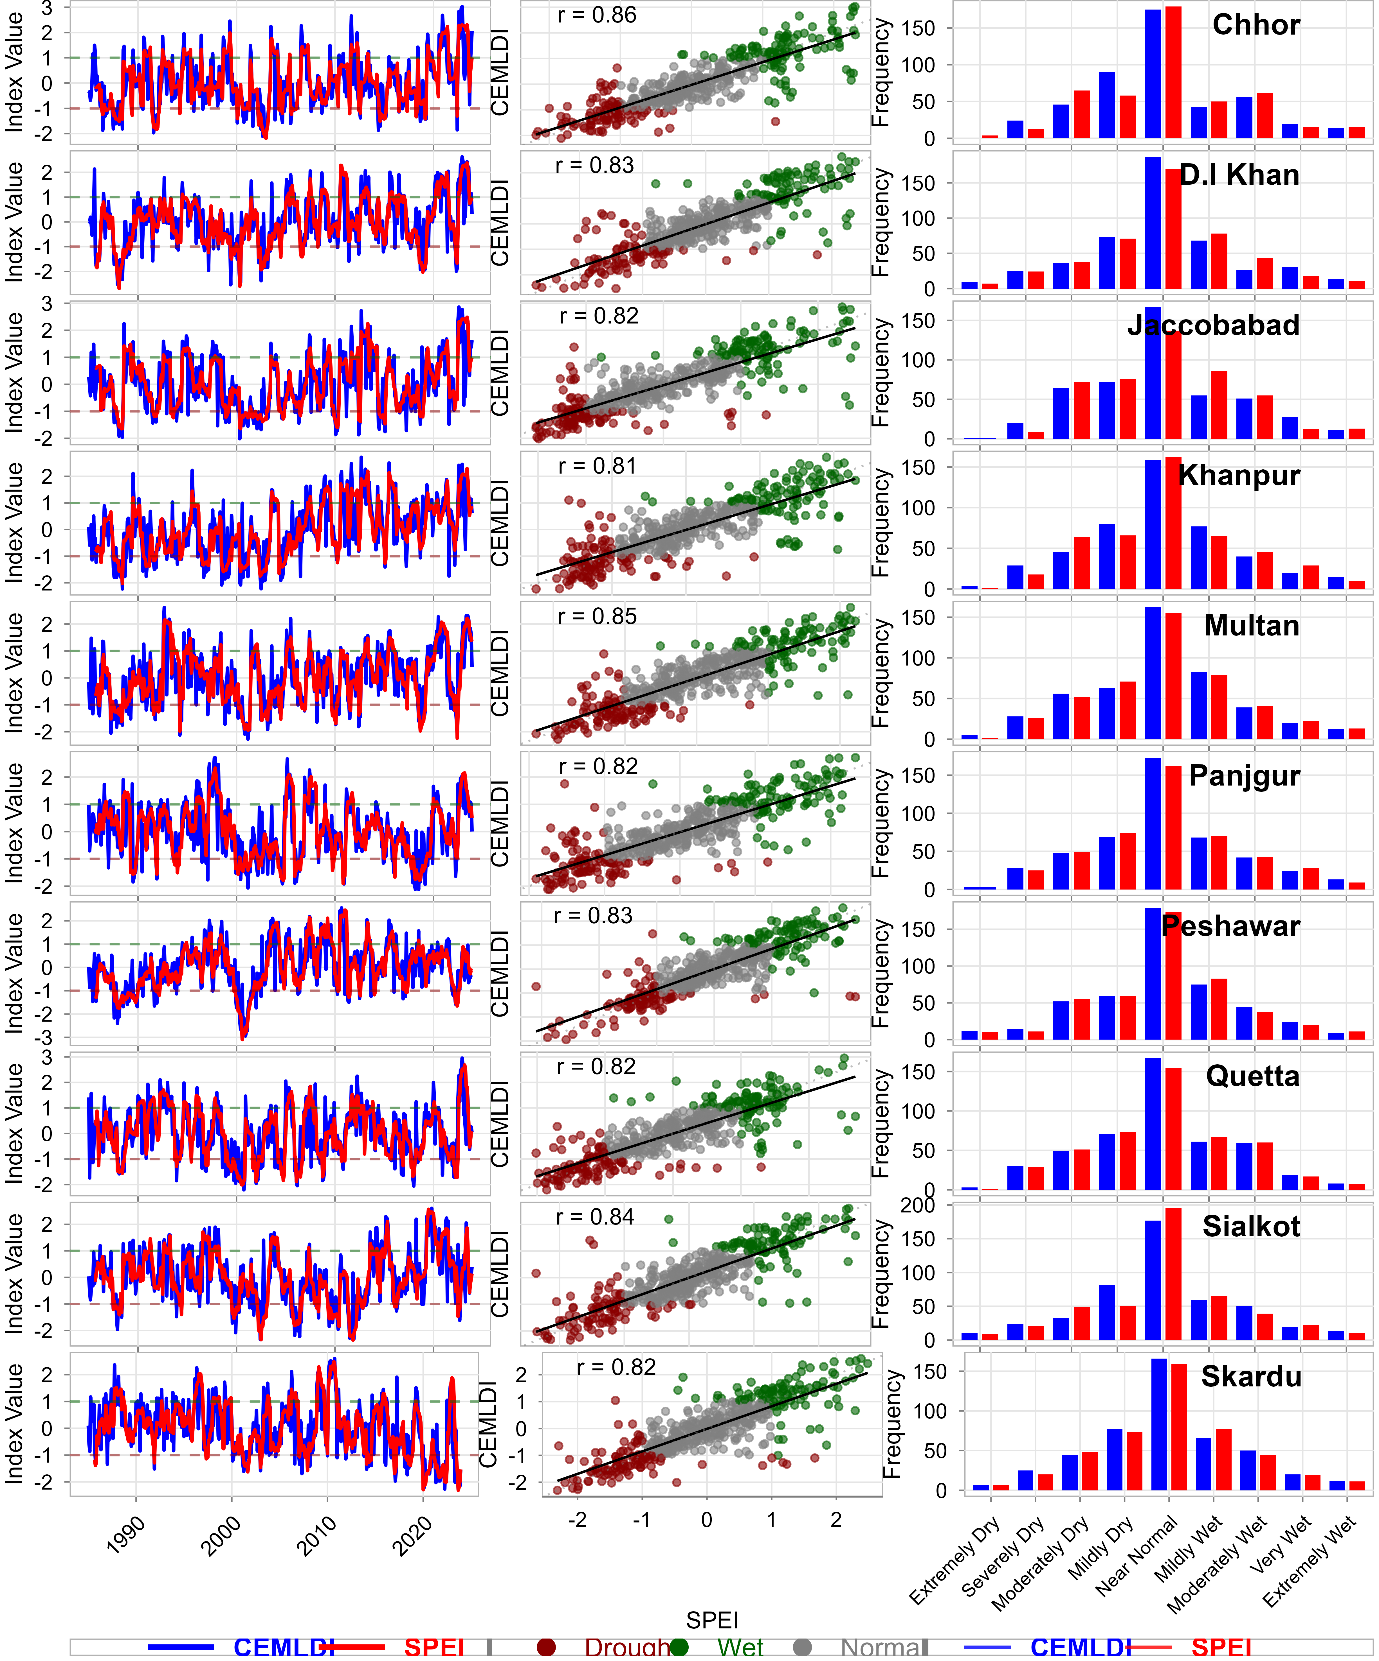


**Figure S1: Graphical presentation of time series, scatter plots, and histograms of drought categories for CEMLDI vs SPEI across 10 meteorological stations at a 9-month time scale in Pakistan.**


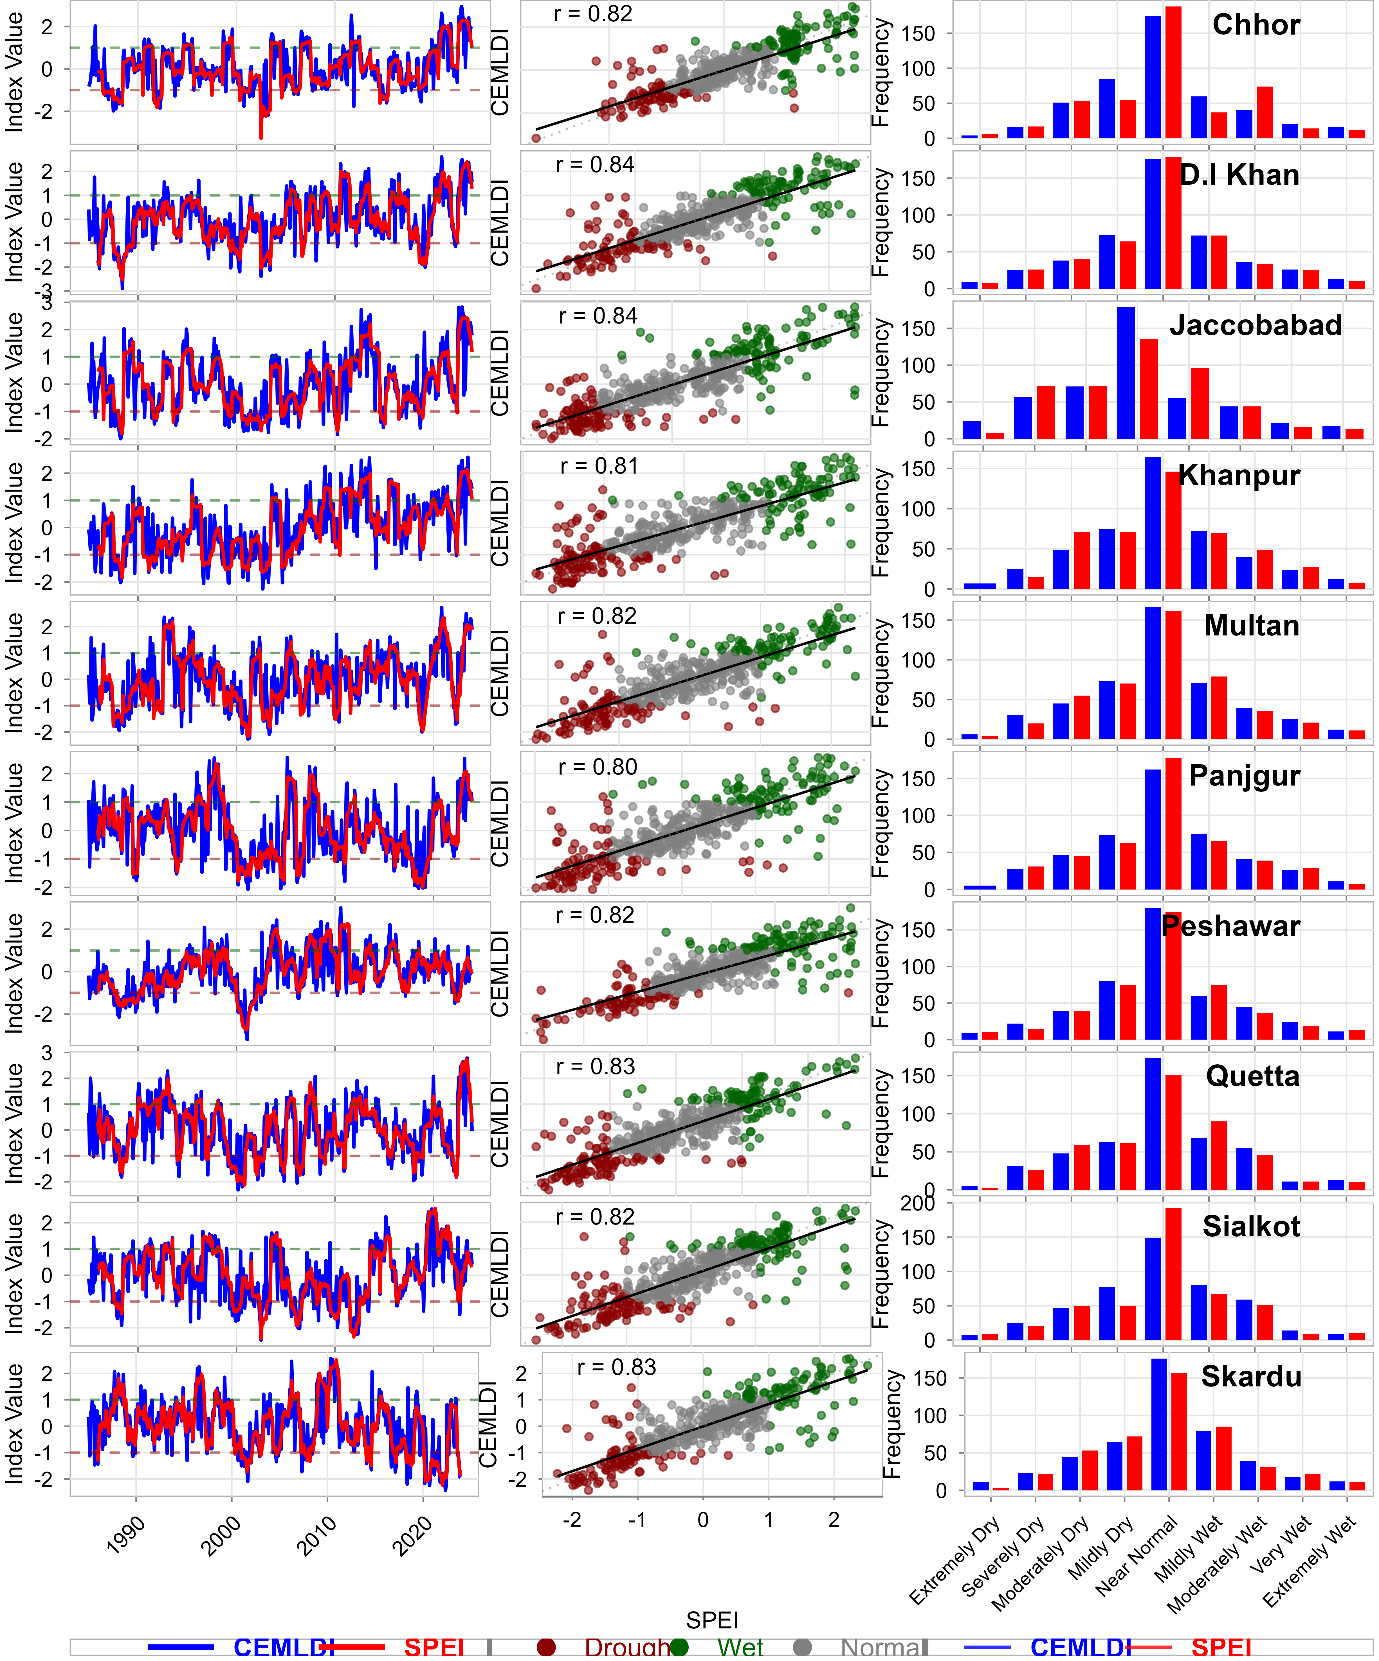


**Figure S2: Graphical presentation of time series, scatter plots, and histograms of drought categories for CEMLDI vs SPEI across 10 meteorological stations at a 12-month time scale in Pakistan.**
